# Supplementary material for: Optimal Contribution Selection Improves the Rate of Genetic Gain in Grain Yield and Yield Stability in Spring Canola in Australia and Canada
Source: MDPI journal article supplement (doi:10.3390/plants12020383), 2023-01-13
Supplement: s1 [file s1]

#### Online Resource S5. Statistical models description.

Statistical models were adapted from Beeck et al. [6], Cullis et al. [16], Kelly et al. [28], Oakey et al. [35], Smith Alison et al. [52] and Stefanova and Buirchell [53].

#### Preliminary single site analysis

In the model with pedigree information, let  $\mathbf{u}_j$  represent the vector of genotype entries in a trial and  $\mathbf{u}_j = \mathbf{u}_a + \mathbf{u}_{\bar{a}}$ , with  $\mathbf{u}_a$  representing the vector of trial entries additive genetic effects and  $\mathbf{u}_{\bar{a}}$  the vector of trial entries non-additive genetic effects; the preliminary single-site model for the observations vector  $\mathbf{y}_j$  for the  $j$ th trial ( $j = 1 \dots t$ , with  $t$  being the number of trials) can be written as

$$\mathbf{y}_j = \mathbf{X}_j \boldsymbol{\beta}_j + \mathbf{Z}_{g_j} \mathbf{u}_{a_j} + \mathbf{Z}_{\bar{g}_j} \mathbf{u}_{\bar{a}_j} + \mathbf{Z}_{p_j} \mathbf{u}_{p_j} + \mathbf{e}_j \quad [1]$$

where,  $\boldsymbol{\beta}_j$ ,  $\mathbf{u}_{a_j}$ ,  $\mathbf{u}_{\bar{a}_j}$ ,  $\mathbf{u}_{p_j}$  correspond to fixed effects, random additive genetic effects, random non-additive genetic effects, and random non-genetic effects, respectively, with their design matrices  $\mathbf{X}_j$ ,  $\mathbf{Z}_{g_j}$ ,  $\mathbf{Z}_{\bar{g}_j}$ ,  $\mathbf{Z}_{p_j}$ . Plot residuals effects are represented by  $\mathbf{e}_j$ . Random effects are assumed to follow a Gaussian distribution with mean zero and are assumed pairwise independent from each other. The variance models used in random and residual effects are defined as

$$\text{var}(\mathbf{u}_{a_j}) = \mathbf{A} \otimes \mathbf{G}_g$$

$$\text{var}(\mathbf{u}_{\bar{a}_j}) = \mathbf{I} \otimes \mathbf{G}_g$$

$$\text{var}(\mathbf{u}_{p_j}) = \mathbf{G}_{p_j}$$

$$\text{var}(\mathbf{e}_j) = \mathbf{R}_j$$

where  $\mathbf{A}$  is the pedigree relationship matrix,  $\mathbf{I}$  is an identity matrix and  $\mathbf{G}_g$ ,  $\mathbf{G}_p$  and  $\mathbf{R}$  correspond to variance matrices.

#### Base across-sites model

The first across-sites model can be represented as an extension of the model presented in eq. 1. If  $\mathbf{y}$  represents the concatenated vector of observations for all trials, the model for  $\mathbf{y}$  can be written as

$$\mathbf{y} = \mathbf{X} \boldsymbol{\beta} + \mathbf{Z}_g \mathbf{u}_a + \mathbf{Z}_{\bar{g}} \mathbf{u}_{\bar{a}} + \mathbf{Z}_p \mathbf{u}_p + \mathbf{e} \quad [2]$$

where terms are as in eq. 1 but now represent concatenated vectors for different trials so that,  $\boldsymbol{\beta}$  includes an overall mean of each trial, trial specific modelling terms and dummy variables for missing values in different trials,  $\mathbf{u}_a$  and  $\mathbf{u}_{\bar{a}}$  are the vectors of random additive and non-additive genetic effects in each trial,  $\mathbf{u}_p$  includes non-genetic effects specific to each trial and  $\mathbf{e}$  is the vector of

residuals partitioned within trials. Random effects follow the same distribution, mean and variances as in the previous model.

#### Factor analytic modelling across sites

The final across-sites model assumed a factor analytic model by adopting a different form for  $\mathbf{G}_g$ , which resulted in a modified variance structure for  $\mathbf{u}_a$  and  $\mathbf{u}_{\bar{a}}$ . The model for  $\mathbf{y}$  is written in the same form as eq. 2, and possesses identical terms and assumptions for its terms except for

$$\text{var}(\mathbf{u}_a) = \mathbf{A} \otimes \mathbf{G}_g^*$$

$$\text{var}(\mathbf{u}_{\bar{a}}) = \mathbf{I} \otimes \mathbf{G}_g^*$$

$$\mathbf{G}_g^* = \mathbf{\Lambda}\mathbf{\Lambda}' + \mathbf{\Psi}$$

where  $\mathbf{\Lambda}$  is a matrix of environmental loadings of dimensions  $t \times k$ ,  $\mathbf{\Psi}$  is a diagonal matrix of trial specific variances with dimensions  $t \times t$ , and  $k$  is the order of the factor analytic model.
