# Supplementary material for: Optimal Contribution Selection Improves the Rate of Genetic Gain in Grain Yield and Yield Stability in Spring Canola in Australia and Canada
Source: Plants (Basel). 2023 Jan 13;12(2):383. doi: 10.3390/plants12020383 (PMC9863350; doi:10.3390/plants12020383)
Supplement: Supplementary file 1 [file plants-12-00383-s001.zip]

Archive with 11 entries (10 files):
- plants-2061854-supplemental files/
- plants-2061854-supplemental files/Online Resource S1 Pedigree diagram_Cowling et al_submit.pdf
- plants-2061854-supplemental files/Online Resource S10_genetic gain PBV all traits_submit.pdf
- plants-2061854-supplemental files/Online Resource S2_Flow of germplasm cycles_submit.pdf
- plants-2061854-supplemental files/Online Resource S3_F-values in pedigree diagram_submit.xlsx
- plants-2061854-supplemental files/Online Resource S4_Coefficients of coancestry_submit.xlsx
- plants-2061854-supplemental files/Online Resource S5_Statistical model description_submit.pdf
- plants-2061854-supplemental files/Online Resource S6_Site phenotypic data summary_submit.xlsx
- plants-2061854-supplemental files/Online Resource S7 Loadings and site vaf_submit.xlsx
- plants-2061854-supplemental files/Online Resource S8_Environmental trends all traits sites_submit.pdf
- plants-2061854-supplemental files/Online Resource S9_correl additive effects across trials_submit.xlsx
