# Supplementary material for: Optimal Contribution Selection Improves the Rate of Genetic Gain in Grain Yield and Yield Stability in Spring Canola in Australia and Canada
Source: Plants (Basel). 2023 Jan 13;12(2):383. doi: 10.3390/plants12020383 (PMC9863350; doi:10.3390/plants12020383)
Supplement: Supplementary file 1 [file plants-12-00383-s001.zip › plants-2061854-supplemental files/Online Resource S3_F-values in pedigree diagram_submit.xlsx]

## Sheet: Online Resource S3 F-values
			Rapid and stable global genetic gain in crop breeding: MDPI Plants
			Wallace A Cowling*, Felipe Castro-Urrea, Katia T Stefanova, Li Li, Robert G Banks,
				Renu Saradadevi, Olaf Sass, Brian P Kinghorn & Kadambot H M Siddique
			*Corresponding author, The University of Western Australia, wallace.cowling@uwa.edu.au
Genotypes -old name	Genotype name		Genotype code in Online Resource S1	Cycle where phenotyped	A-value	F	Description
12N420WS>S0A005	12N420WS>F1A005		A1		1	0	F1 progeny of fully inbred parents
12N421WS>S0A003	12N421WS>F1A003		B		1	0	F1 progeny of fully inbred parents
12N420WS>S0A005-S1A1	12N420WS>F1A005-F2A1		A2	Cycle 1	1.5	0.5	F2 progeny of fully inbred parents
13N520BWS>S0A003	13N520BWS>S0A003		C1	Cycle 1	1.0188	0.018798	S0 progeny of outbred F1 parents
13N520BWS>S0A003-S1A3	13N520BWS>S0A003-S1A3		C2		1.5094	0.509399	S1 individual used as cross parent
13N520BWS>S0A003-S1A3-S2A4	13N520BWS>S0A003-S1A3-S2A4		C3	Cycle 2	1.7547	0.7547	S2 individual, self of cross parent
13N520BWS>S0A003-S1A3-S2A4-S3A19	13N520BWS>S0A003-S1A3-S2A4-S3A19		C4		1.87735	0.87735	S3 individual used as cross parent
13N520BWS>S0A003-S1A3-S2A4-S3A19-S4A03	13N520BWS>S0A003-S1A3-S2A4-S3A19-S4A03		C5	Cycle 3	1.93867	0.938675	S4 individual, self of cross parent
13N520BWS>S0A003-S1A3-S2A4-S3A19-S4A03-S5A04	13N520BWS>S0A003-S1A3-S2A4-S3A19-S4A03-S5A04		C6		1.96934	0.969337	S5 individual used as cross parent
13N530AWS>S0A008	13N530AWS>S0A008		D1	Cycle 1	1.02065	0.020651	S0 progeny of outbred F1 parents
13N530AWS>S0A008-S1A1	13N530AWS>S0A008-S1A1		D2		1.51032	0.510325	S1 individual used as cross parent
13N521AWS>S0A005	13N521AWS>S0A005		E1	Cycle 1	1.01145	0.011446	S0 progeny of outbred F1 parents
13N521AWS>S0A005-S1A3	13N521AWS>S0A005-S1A3		E2		1.50572	0.505723	S1 individual used as cross parent
13N521AWS>S0A005-S1A3-S2A1	13N521AWS>S0A005-S1A3-S2A1		E3	Cycle 2	1.75286	0.752861	S2 individual, self of cross parent
13N521AWS>S0A005-S1A3-S2A3	13N521AWS>S0A005-S1A3-S2A3		E4	Cycle 2	1.75286	0.752861	S2 individual, self of cross parent
13N521CWS>S0A006	13N521CWS>S0A006		F1	Cycle 1	1.01145	0.011446	S0 progeny of outbred F1 parents
13N521CWS>S0A006-S1A2	13N521CWS>S0A006-S1A2		F2		1.50572	0.505723	S1 individual used as cross parent
13N529BWS>S0A005	13N529BWS>S0A005		G1	Cycle 1	1.02792	0.027922	S0 progeny of outbred F1 parents
13N529BWS>S0A005-S1A2	13N529BWS>S0A005-S1A2		G2		1.51396	0.513961	S1 individual used as cross parent
13N529CWS>S0A009	13N529CWS>S0A009		H1	Cycle 1	1.02792	0.027922	S0 progeny of outbred S1 parents
13N529CWS>S0A009-S1A1	13N529CWS>S0A009-S1A1		H2		1.51396	0.513961	S1 individual used as cross parent
15N167WS>S0A04	15N167WS>S0A04		I	Cycle 2	1.02153	0.021525	S0 progeny of outbred S1 parents
15N186WS>S0A08	15N186WS>S0A08		J1	Cycle 2	1.02232	0.022317	S0 progeny of outbred S1 parents
15N186WS>S0A08-S1A02	15N186WS>S0A08-S1A02		J2		1.51116	0.511159	S1 individual used as cross parent
15N186WS>S0A08-S1A02-S2A03	15N186WS>S0A08-S1A02-S2A03		J3	Cycle 3	1.75558	0.755579	S2 individual, self of cross parent
15N186WS>S0A08-S1A02-S2A03-S3A01	15N186WS>S0A08-S1A02-S2A03-S3A01		J4		1.87779	0.87779	S3 individual used as cross parent
15N186WS>S0A08-S1A09	15N186WS>S0A08-S1A09		J5		1.51116	0.511159	S1 individual used as cross parent
15N186WS>S0A08-S1A26	15N186WS>S0A08-S1A26		J6		1.51116	0.511159	S1 individual used as cross parent
15N186WS>S0A05	15N186WS>S0A05		K	Cycle 2	1.02232	0.022317	S0 progeny of outbred S1 parents
15N171WS>S0A01	15N171WS>S0A01		L1	Cycle 2	1.02232	0.022317	S0 progeny of outbred S1 parents
15N171WS>S0A01-S1A49	15N171WS>S0A01-S1A49		L2		1.51116	0.511159	S1 individual used as cross parent
17N718WS>S0A01	17N718WS>S0A01		M	Cycle 3	1.07656	0.076564	S0 progeny of outbred Sx parents
17N718WS>S0A02	17N718WS>S0A02		N	Cycle 3	1.07656	0.076564	S0 progeny of outbred Sx parents
17N799WS>S0A05	17N799WS>S0A05		O1	Cycle 3	1.07656	0.076564	S0 progeny of outbred S1 parents
17N799WS>S0A05-S1A18	17N799WS>S0A05-S1A18		O2		1.57004	0.570038	S1 individual used as cross parent
17N799WS>S0A05-S1A03	17N799WS>S0A05-S1A03		O3		1.57004	0.570038	S1 individual used as cross parent
19N435WS>S0A02	19N435WS>S0A02		P	Cycle 4	1.07656	0.076564	S0 progeny of outbred Sx parents
19N550WS>S0A01	19N550WS>S0A01		Q	Cycle 4	1.32562	0.325617	S0 progeny of outbred Sx parents
