# Supplementary material for: Optimal Contribution Selection Improves the Rate of Genetic Gain in Grain Yield and Yield Stability in Spring Canola in Australia and Canada
Source: Plants (Basel). 2023 Jan 13;12(2):383. doi: 10.3390/plants12020383 (PMC9863350; doi:10.3390/plants12020383)
Supplement: Supplementary file 1 [file plants-12-00383-s001.zip › plants-2061854-supplemental files/Online Resource S4_Coefficients of coancestry_submit.xlsx]

## Sheet: Online Resource S4 f-values
			Rapid and stable global genetic gain in crop breeding: MDPI Plants
			Wallace A Cowling*, Felipe Castro-Urrea, Katia T Stefanova, Li Li, Robert G Banks, Renu Saradadevi, Olaf Sass, Brian P Kinghorn & Kadambot H M Siddique
			*Corresponding author, The University of Western Australia, wallace.cowling@uwa.edu.au
Genotype name 1	Genotype name 2		Codes of related genotypes in Online Resource S1	A-value	f	f expected with non-inbred parents	Type of relationship	Explanation
12N420WS>F1A005-F2A1	13N520BWS>S0A003		A2 - C1	0.518798	0.259399	0.25	Cyc1 F2 and S0 progeny with common F1	Self and cross progeny are equivalent to full-sibs and increase accuracy of PBV in Cyc1
13N520BWS>S0A003	13N520BWS>S0A003-S1A3		C1 - C2	1.0188	0.509399		S0:S1 parent-offspring by selfing	Selfing generates S1 offspring for crossing to begin Cyc2
13N520BWS>S0A003	13N520BWS>S0A003-S1A3-S2A4		C1 - C3	1.0188	0.509399		S0(Cyc1):S2(Cyc2) through selfing	Selfing connects Cyc1 to Cyc2
13N520BWS>S0A003	13N520BWS>S0A003-S1A3-S2A4-S3A19-S4A03		C1 - C5	1.0188	0.509399		S0(Cyc1):S4(Cyc3) through selfing	Selfing connects Cyc1 to Cyc3
13N520BWS>S0A003-S1A3-S2A4	13N520BWS>S0A003-S1A3-S2A4-S3A19-S4A03		C3 - C5	1.7547	0.87735		S2(Cyc2):S4(Cyc3) through selfing	Selfing connects Cyc2 to Cyc3
13N520BWS>S0A003-S1A3-S2A4-S3A19-S4A03	13N520BWS>S0A003-S1A3-S2A4-S3A19-S4A03-S5A04		C5 - C6	1.93867	0.969337		S4:S5 parent-offspring by selfing	Selfing generates S5 offspring for crossing to begin Cyc4
13N520BWS>S0A003	13N521AWS>S0A005		C1 - E1	0.275065	0.137533	0.125	Cyc1 half-sibs; parents F1s (not inbred)	Inclusion of half-sibs increases accuracy of PBV of S0 progeny in Cyc1
13N520BWS>S0A003	13N521CWS>S0A006		C1 - F1	0.275065	0.137533	0.125	Cyc1 half-sibs; parents F1s (not inbred)	Inclusion of half-sibs increases accuracy of PBV of S0 progeny in Cyc1
13N521AWS>S0A005	13N521CWS>S0A006		E1 - F1	0.507423	0.253711	0.25	Cyc1 half-sibs; parents F1s (not inbred)	Inclusion of half-sibs increases accuracy of PBV of S0 progeny in Cyc1
13N520BWS>S0A003	13N530AWS>S0A008		C1 - D1	0.0430497	0.0215249		Cyc1 S0 progeny unrelated except for ancestral inbreeding	Evidence for broad genetic diversity in Cyc1
13N529BWS>S0A005	13N529CWS>S0A009		G1 - H1	0.52391	0.261955	0.25	Cyc1 full-sibs; parents F1s (not inbred)	Full-sibs improve accuracy of PBV
13N520BWS>S0A003	15N167WS>S0A04		C1 - I	0.530924	0.265462	0.125	Grandparent-grandchild with partially inbred parent	Connects Cyc1 to Cyc2 with close relationships due to selfing
13N520BWS>S0A003-S1A3	15N167WS>S0A04		C2 - I	0.776224	0.388112	0.25	Parent-offspring with partially inbred parent	Partially inbred parent increases parent-offspring coancestry in Cyc2
15N186WS>S0A08	15N167WS>S0A04		J1 - I	0.159956	0.079978	0	Cyc2 S0 progeny unrelated except for ancestral inbreeding	Evidence for broad genetic diversity in Cyc2
15N186WS>S0A08	15N186WS>S0A05		J1 - K	0.777238	0.388619	0.25	Cyc2 full-sibs with partially inbred parents	Partially inbred parents increase parent-offspring coancestry in Cyc2
15N186WS>S0A08	13N521AWS>S0A005-S1A3-S2A1		J1 - E3	0.775179	0.387589	0.25	Cyc2 self- and cross-sibs with common parent	Self- and cross-sibs increase coancestry and accuracy of PBV in Cyc2 progeny
13N521AWS>S0A005	15N186WS>S0A08		E1 - J1	0.52804	0.26402	0.125	S0(Cyc1):S0(Cyc2) grandparent-grandchild with partially inbred parent	Connects Cyc1 to Cyc2 with close relationships due to selfing
13N521AWS>S0A005-S1A3-S2A1	13N521AWS>S0A005-S1A3-S2A3		E3 - E4	1.50572	0.752861		Cyc2 S2-sibs from partially inbred S1 parent	Self-sibs increase coancestry and accuracy of PBV in progeny in Cyc2
13N521AWS>S0A005	13N521AWS>S0A005-S1A3-S2A1		E1 - E3	1.01145	0.505723	0.125	S0(Cyc1):S2(Cyc2) grandparent-grandchild through selfing	Connects Cyc1 to Cyc2 with close relationships due to selfing
15N186WS>S0A08	15N171WS>S0A01		J1 - L1	0.280151	0.140075		Cyc4 S0 progeny related by common ancestors and with selfing in pedigree	These two progeny have several ancestors in common; equivalent to half-sibs
17N718WS>S0A01	17N718WS>S0A02		M - N	0.923691	0.461845	0.25	Cyc3 full-sibs with partially inbred parents	Partially inbred parents increase parent-offspring coancestry in Cyc3
17N718WS>S0A01	13N520BWS>S0A003-S1A3-S2A4-S3A19-S4A03		M - C5	1.01524	0.507619	0.25	Cyc3 self- and cross-sibs with common parent	Self- and cross-sibs increase coancestry and accuracy of PBV in Cyc3 progeny
17N718WS>S0A01	17N799WS>S0A05		M - O1	0.402181	0.20109	0.0625	Cyc3 first cousins with selfing of common grandparent	Selfing in grandparent increases coancestry and accuracy of PBV in Cyc3 progeny
15N186WS>S0A08	19N550WS>S0A01		J1 - Q	0.836776	0.418388		Cyc4 S0 progeny has ancestor in Cyc2 related by selfing and crossing	Connects Cyc2 and Cyc4 with close relationships due to selfing
15N186WS>S0A08-S1A02-S2A03	19N550WS>S0A01		J3 - Q	1.20341	0.601703		Cyc4 S0 progeny has ancestor in Cyc3 related by selfing and crossing	Connects Cyc3 and Cyc4 with close relationships due to selfing
19N435WS>S0A02	17N799WS>S0A05		P - O1	0.646601	0.323301		Cyc4 S0 progeny has ancestor in Cyc3 related by selfing and crossing	Connects Cyc3 and Cyc4 with close relationships due to selfing
19N435WS>S0A02	13N520BWS>S0A003-S1A3-S2A4		P - C3	0.953913	0.476957		Cyc4 S0 progeny has ancestor in Cyc2 related by selfing and crossing	Connects Cyc2 and Cyc4 with close relationships due to selfing
19N435WS>S0A02	13N520BWS>S0A003-S1A3-S2A4-S3A19-S4A03		P - C5	1.0459	0.52295		Cyc4 S0 progeny has ancestor in Cyc3 related by selfing and crossing	Connects Cyc3 and Cyc4 with close relationships due to selfing
19N550WS>S0A01	17N799WS>S0A05		Q - O1	0.895655	0.447827		Cyc4 S0 progeny has ancestor in Cyc3 related by selfing and crossing	Connects Cyc3 and Cyc4 with close relationships due to selfing
19N435WS>S0A02	19N550WS>S0A01		P - Q	0.524391	0.262195		Cyc4 S0 progeny related by common ancestors in pedigree	These two progeny have several ancestors in common; equivalent to full-sibs
