# Supplementary material for: Optimal Contribution Selection Improves the Rate of Genetic Gain in Grain Yield and Yield Stability in Spring Canola in Australia and Canada
Source: Plants (Basel). 2023 Jan 13;12(2):383. doi: 10.3390/plants12020383 (PMC9863350; doi:10.3390/plants12020383)
Supplement: Supplementary file 1 [file plants-12-00383-s001.zip › plants-2061854-supplemental files/Online Resource S6_Site phenotypic data summary_submit.xlsx]

## Sheet: Online Resource 5
Rapid and stable global genetic gain in crop breeding: MDPI Plants
Wallace A Cowling*, Felipe Castro-Urrea, Katia T Stefanova, Li Li, Robert G Banks, Renu Saradadevi, Olaf Sass, Brian P Kinghorn & Kadambot H M Siddique
*Corresponding author, The University of Western Australia, wallace.cowling@uwa.edu.au
			No. plots in trial	No. plots with values				In MMM- FA base model	Fixed spatial effects (Wald statistic)					Random effects (variance components ± SE)															Narrow-sense heritability			Accuracy (ri) of additive genetic values (mean ± SD)
Trial code	Cycle no.	Country			Mean	Min	Max		Linear range		Linear row			Range			Row			Additive genetic			Non-additive genetic			Residual error			h2 ± SE			S0 genotypes			S2+ genotypes
Grain yield (t ha-1)
2014AU1	1	Australia	2136	2117	1.71789	0.592593	3.09
2016AU1	2	Australia	1632	1630	2.5754	0.9278	4.463	MMM-FA	17.4	***	113.2	***								0.0754574	±	0.00960775	0.05084	±	0.00628934	0.0600375	±	0.00372462	0.404956	±	0.0395941	0.806	±	0.02	0.858	±	0.029
2016AU2	2	Australia	1632	1619	1.3363	0	3.35	MMM-FA	23.9	***	13.4	***		0.0116232	±	0.00428987	0.00943868	±	0.00294827	0.228376	±	0.0242374	0.0914332	±	0.011773	0.0572384	±	0.00411307	0.605695	±	0.0395452	0.853	±	0.013	0.901	±	0.018
2018AU1	3	Australia	2112	2112	1.0213	0.1479	2.3418	MMM-FA	51.6	***	60.4	***								0.027273	±	0.00452798	0.0180167	±	0.00185883	0.0440249	±	0.00312635	0.305359	±	0.0399946	0.86	±	0.032	0.876	±	0.05
2018AU2	3	Australia	2112	2101	0.3325	0	1.0225	MMM-FA												0.000443037	±	0.000198616	0.00583796	±	0.000624981	0.0153053	±	0.000916229	0.020524	±	0.00912602	0.654	±	0.066	0.59	±	0.163
2018CA1	3	Canada	2112	2112	3.3219	0.1944	6.7083	MMM-FA												0.168761	±	0.0268139	0.11401	±	0.0101506	0.237914	±	0.0170701	0.324113	±	0.0398446	0.871	±	0.03	0.873	±	0.062
2020AU1	4	Australia	912	884	3.572	2	4.875	MMM-FA									0.028776	±	0.0091964	0.064323	±	0.0127527	0.0231047	±	0.00692387	0.0882491	±	0.0078563	0.366144	±	0.0574648	0.826	±	0.035	0.851	±	0.025
2020AU2	4	Australia	960	953	1.729	0.35	3.034	MMM-FA	17.5	***										0.0844705	±	0.015116	0.0160285	±	0.0071714	0.0446615	±	0.00377355	0.581911	±	0.0647673	0.853	±	0.032	0.896	±	0.021
2020CA1	4	Canada	816	806	2.2474	0.7614	4.0277	MMM-FA									0.0639994	±	0.017258	0.107653	±	0.0175922	0.0160359	±	0.00754888	0.0493823	±	0.00451869	0.622016	±	0.0602608	0.884	±	0.024	0.899	±	0.023
Average of sites in cycles 2,3,4: global					2.01697															0.0945946			0.0419134			0.0746016			0.40384			0.825875			0.843
Average of sites in cycles 2,3,4: Australia					1.76108															0.0800572			0.0342102			0.0515861			0.380765			0.808667			0.828667
Average of sites in cycles 2,3,4: Canada					2.78465															0.138207			0.065023			0.143648			0.473064			0.8775			0.886
Days to 50% flower
2016AU1	2	Australia	1632	1627	107.2	75	138	MMM-FA												98.878	±	9.958	12.307	±	3.438	5.928	±	0.397	0.844296	±	0.0362335	0.917938	±	0.00639943	0.950497	±	0.012698
2018AU1	3	Australia	2112	2111	104.9	64	130	MMM-FA	107	***										30.7274	±	3.42279	6.56102	±	1.03855	7.58369	±	0.686437	0.684777	±	0.0343948	0.901516	±	0.0174295	0.928918	±	0.0204801
2018CA1	3	Canada	2112	2108	44.08	40	49	MMM-FA	14	***	8	**								1.60834	±	0.188351	0.469962	±	0.0509504	0.589388	±	0.047019	0.602896	±	0.0373158	0.904854	±	0.0183378	0.919858	±	0.0337637
2020AU1	4	Australia	960	960	100.3	79	121	MMM-FA												55.5965	±	6.98904	4.63655	±	2.03757	4.28378	±	0.359892	0.861736	±	0.0399267	0.925614	±	0.0101226	0.947791	±	0.0136488
2020CA1	4	Canada	816	816	44.42	39	48	MMM-FA	11	***										1.69146	±	0.264813	0.336037	±	0.105448	0.474969	±	0.0415626	0.675917	±	0.0577628	0.891945	±	0.018467	0.900419	±	0.0241917
Average of sites in cycles 2,3,4: global					80.18															37.7003			4.86211			3.77197			0.733924			0.908373			0.929496
Average of sites in cycles 2,3,4: Australia					104.133															61.734			7.83486			5.93183			0.796936			0.915023			0.942402
Average of sites in cycles 2,3,4: Canada					44.25															1.6499			0.403			0.532178			0.639406			0.8984			0.910138
Plant height (cm)
2016AU1	2	Australia	1632	1630	139	90	180	MMM-FA	4.6	*				8.09913	±	3.28188				105.612	±	10.9535	23.4022	±	4.99828	51.4217	±	3.31592	0.585316	±	0.0377095	0.862957	±	0.0140192	0.912979	±	0.0188471
2018AU1	3	Australia	2112	2112	115.8	70	155	MMM-FA			44.6	***		32.5582	±	10.5446				52.6199	±	7.44002	19.9205	±	3.20056	59.2868	±	3.99786	0.399158	±	0.039967	0.870866	±	0.0280354	0.895121	±	0.0382792
2020AU1	4	Australia	960	960	132.8	90	160	MMM-FA			12.1	***					1.60589	±	0.951837	140.508	±	18.2325	5.73067	±	6.2765	42.3819	±	3.6466	0.744924	±	0.0454215	0.909366	±	0.0160514	0.948833	±	0.0124647
2020CA1	4	Canada	816	816	103.1	70	145	MMM-FA						1.44366	±	1.6941				64.9798	±	15.4447	11.0584	±	10.6649	106.212	±	8.99065	0.356541	±	0.0675632	0.808978	±	0.0406547	0.803688	±	0.035026
Average of sites in cycles 2,3,4: global					122.675															90.9301			15.0279			64.8257			0.521485			0.863042			0.890155
Average of sites in cycles 2,3,4: Australia					129.2															99.5802			16.3511			51.0301			0.576466			0.881063			0.918978
Average of sites in cycles 2,3,4: Canada					103.1															64.9798			11.0584			106.212			0.356541			0.808978			0.803688
Seed oil (%) at 6% moisture
2014AU1	1	Australia	2136	2121	46.6766	41.8	51.5
2016AU1	2	Australia	1632	1589	49.47	41.2	58	MMM-FA			22	***		0.717555	±	0.238676	0.051457	±	0.0190474	1.74929	±	0.193091	0.660422	±	0.0944313	0.990877	±	0.0759473	0.514409	±	0.0393896	0.852296	±	0.0131139	0.901082	±	0.0181253
2016AU2	2	Australia	1632	1632	46.72	39.1	52.1	MMM-FA	102	***							0.203871	±	0.0518611	1.18454	±	0.149459	0.641243	±	0.0987383	0.874778	±	0.0595792	0.438628	±	0.0413955	0.808794	±	0.0216416	0.861563	±	0.0365729
2018AU1	3	Australia	2112	2104	47.44	40.15	52.94	MMM-FA												2.4195	±	0.265765	0.284843	±	0.0654385	1.04492	±	0.0744812	0.645327	±	0.0351229	0.912122	±	0.0143327	0.940089	±	0.0208924
2018CA1	3	Canada	2112	2107	38.402	18.8	45.872	MMM-FA	23	***										3.17042	±	0.471032	1.79179	±	0.171559	4.62995	±	0.360737	0.330522	±	0.0382022	0.876864	±	0.0280733	0.883277	±	0.0551966
2020AU1	4	Australia	960	960	44.05	40.2	48.6	MMM-FA	6	*										1.32386	±	0.19992	0.288486	±	0.0741314	0.512055	±	0.04614	0.623168	±	0.0543198	0.882832	±	0.0191453	0.906448	±	0.0196873
2020CA1	4	Canada	816	804	42.46	36.18	48.23	MMM-FA									0.307109	±	0.111112	2.42741	±	0.379993	0.577175	±	0.148381	0.776355	±	0.0884897	0.642013	±	0.0580449	0.889918	±	0.0202628	0.894701	±	0.0262071
Average of sites in cycles 2,3,4: global					44.757															2.04584			0.707326			1.47149			0.532344			0.870471			0.89786
Average of sites in cycles 2,3,4: Australia					46.92															1.6693			0.468748			0.855658			0.555383			0.864011			0.902296
Average of sites in cycles 2,3,4: Canada					40.431															2.79892			1.18448			2.70315			0.486267			0.883391			0.888989
Protein in meal (%) at 10% moisture
2014AU1	1	Australia	2136	2121	42.6019	40.4	47.6
2016AU1	2	Australia	1632	1589	40.47	32.8	49.1	MMM-FA			51	***		0.159388	±	0.057554				1.98611	±	0.20515	0.323408	±	0.0902322	1.26728	±	0.0816474	0.555276	±	0.037072	0.86718	±	0.0142341	0.917697	±	0.0194783
2016AU2	2	Australia	1632	1632	40.89	32.6	47.5	MMM-FA						0.909346	±	0.289576				1.56326	±	0.192901	0.587966	±	0.119004	1.2978	±	0.0841961	0.453246	±	0.0412326	0.826395	±	0.0196049	0.879172	±	0.035264
2018AU1	3	Australia	2112	2104	43.33	37.29	49.66	MMM-FA			28	***								1.99403	±	0.214895	0.350321	±	0.0562654	0.650531	±	0.0493459	0.665812	±	0.0338292	0.906468	±	0.0159534	0.933686	±	0.0225768
2018CA1	3	Canada	2112	2107	44.58	31.68	50.53	MMM-FA	39	***	12	***								1.58343	±	0.222796	0.606335	±	0.0870875	2.33511	±	0.151848	0.349939	±	0.0370342	0.878888	±	0.0277199	0.890709	±	0.0461373
2020AU1	4	Australia	960	960	34.62	30.6	38.9	MMM-FA			8	**		0.0862593	±	0.0427248				1.77104	±	0.227444	0.0913709	±	0.0720884	0.527036	±	0.047173	0.741193	±	0.0448351	0.914059	±	0.0140547	0.948537	±	0.0125063
2020CA1	4	Canada	816	804	42.64	36.42	47.92	MMM-FA			5	*								2.20282	±	0.304785	0.160381	±	0.102215	1.39833	±	0.164206	0.585617	±	0.0527677	0.922233	±	0.0158768	0.939415	±	0.0153608
Average of sites in cycles 2,3,4: global					41.0883															1.85011			0.353297			1.24602			0.558514			0.889609			0.918304
Average of sites in cycles 2,3,4: Australia					39.8275															1.82861			0.338266			0.935662			0.603882			0.878525			0.919773
Average of sites in cycles 2,3,4: Canada					43.61															1.89312			0.383358			1.86672			0.467778			0.90056			0.915062
Glucosinolates (μmole g-1 seed)
2014AU1	1	Australia	2136	2121	9.32865	5.6	54.3
2016AU1	2	Australia	1632	1589	9.766	5.1	31.6	MMM-FA						0.33615	±	0.117847				5.85038	±	0.498809	0.358251	±	0.165298	1.49286	±	0.096603	0.759642	±	0.0291968	0.903575	±	0.0112417	0.944758	±	0.0136281
2016AU2	2	Australia	1632	1632	11.14	5.2	29	MMM-FA	59.9	***	11.15	***					0.0597936	±	0.0349137	4.982	±	0.441161	0.507077	±	0.155097	1.02908	±	0.0735509	0.764326	±	0.0312616	0.89886	±	0.0121217	0.937334	±	0.0290065
2018AU1	3	Australia	2112	2103	12.0316	0.1064	26.438	MMM-FA	41.22	***	70.48	***								7.04697	±	0.842561	0.671679	±	0.251039	2.95265	±	0.212222	0.660367	±	0.0376349	0.904558	±	0.0170954	0.934325	±	0.0240887
2018CA1	3	Canada	2112	2107	13.89	3.26	42.01	MMM-FA	40.72	***										4.01978	±	0.866716	7.26129	±	0.507253	11.533	±	0.842292	0.176197	±	0.0336824	0.827711	±	0.0428212	0.804336	±	0.112815
2020AU1	4	Australia	960	960	10.86	2.8	24.1	MMM-FA	10.17	**							0.204702	±	0.0861827	4.45532	±	0.680307	0.535833	±	0.257969	1.54488	±	0.13464	0.681654	±	0.0553698	0.886817	±	0.0200171	0.924228	±	0.0165859
2020CA1	4	Canada	816	804	10.094	2.19	31.65	MMM-FA												7.15371	±	1.3	1.61291	±	0.578644	2.66873	±	0.235952	0.625578	±	0.0678561	0.87283	±	0.0253127	0.881215	±	0.0267785
Average of sites in cycles 2,3,4: global					11.2969															5.58469			1.82451			3.53688			0.611294			0.882392			0.904366
Average of sites in cycles 2,3,4: Australia					10.9494															5.58367			0.51821			1.75487			0.716497			0.898453			0.935161
Average of sites in cycles 2,3,4: Canada					11.992															5.58675			4.4371			7.10089			0.400888			0.850271			0.842775
Oleic acid (% of total fatty acids)
2014AU1	1	Australia	2136	2121	62.2682	57.5	71.3	MMM-FA
2016AU1	2	Australia	1632	1589	60.27	50.2	72.2	MMM-FA			15	***								5.9819	±	0.494152	0.470208	±	0.158822	0.828497	±	0.0540184	0.821621	±	0.0276183	0.914658	±	0.00809293	0.950634	±	0.00972256
2016AU2	2	Australia	1632	1632	59.59	48.6	71	MMM-FA									0.114182	±	0.0499892	4.43262	±	0.437037	0.920521	±	0.189741	1.51079	±	0.104743	0.645785	±	0.0361904	0.868351	±	0.014209	0.914382	±	0.0306447
2018AU1	3	Australia	2112	2104	63.01	56.56	69.82	MMM-FA	52	***										5.08098	±	0.381118	0.0863603	±	0.070395	0.471145	±	0.0418062	0.901125	±	0.0160634	0.943686	±	0.00649677	0.966113	±	0.0155826
2020AU1	4	Australia	960	960	63.81	58.1	71.4	MMM-FA			37	***		0.0300375	±	0.0138497				4.55107	±	0.480218	0.0699278	±	0.119054	0.223574	±	0.0199587	0.939416	±	0.0279709	0.950605	±	0.00639723	0.969211	±	0.00870327
Average of sites in cycles 2,3,4: Australia					61.67															5.01164			0.386754			0.7585			0.826987			0.919325			0.950085
Phoma (blackleg) disease score: 1 (very susceptible) to 9 (very resistant)
2016AU2	2	Australia	1632	1631	3.72	1	9	MMM-FA	28.33	***				0.123464	±	0.0429162				1.13556	±	0.111375	0.134997	±	0.0487918	0.624658	±	0.0378311	0.599171	±	0.0345884	0.858147	±	0.0179775	0.913263	±	0.0243109
2018AU2	3	Australia	2112	2112	5.553	2	8	MMM-FA												0.342439	±	0.0874621	0.623697	±	0.0779956	1.47089	±	0.0954461	0.140515	±	0.03258	0.800929	±	0.0483814	0.794741	±	0.0945591
2020AU2	4	Australia	912	912	5.993	1	8	MMM-FA	18.22	***										0.789297	±	0.142622	0.108682	±	0.0679839	0.486741	±	0.039535	0.570005	±	0.0649184	0.855697	±	0.0282469	0.90465	±	0.0201328
Average of sites in cycles 2,3,4: Australia					5.08867															0.755764			0.289125			0.860763			0.436564			0.838258			0.870885
100 seed weight (g)
2014AU1	1	Australia	2136	2122	0.342849	0.277	0.413	MMM-FA
2016AU1	2	Australia	1632	1589	0.3147	0.213	0.473	MMM-FA			12.8	***								0.00117848	±	0.000117311	0.000185355	±	4.45576e-05	0.000207318	±	1.39563e-05	0.750073	±	0.0371194	0.897985	±	0.00770336	0.937974	±	0.0107524
2016AU2	2	Australia	1632	1632	0.3128	0.169	0.452	MMM-FA									0.000178394	±	3.96853e-05	0.000570949	±	7.72612e-05	0.000286913	±	5.44659e-05	0.000482254	±	3.32206e-05	0.426045	±	0.0441946	0.805562	±	0.0226544	0.859821	±	0.0378642
2018AU1	3	Australia	2112	2104	0.3335	0.259	0.449	MMM-FA												0.000813314	±	9.07948e-05	0.000153485	±	2.31871e-05	0.000196656	±	1.54631e-05	0.699051	±	0.034281	0.907506	±	0.0155195	0.9342	±	0.0222323
2020AU1	4	Australia	960	960	0.3393	0.264	0.453	MMM-FA									3.13427e-05	±	1.0702e-05	0.000922754	±	0.00012491	0.000124562	±	4.24871e-05	0.000153156	±	1.34962e-05	0.768659	±	0.0471312	0.897516	±	0.0160907	0.924971	±	0.0172572
Average of sites in cycles 2,3,4: Australia					0.325075															0.000871373			0.000187579			0.000259846			0.660957			0.877142			0.914241
