# Supplementary material for: Optimal Contribution Selection Improves the Rate of Genetic Gain in Grain Yield and Yield Stability in Spring Canola in Australia and Canada
Source: Plants (Basel). 2023 Jan 13;12(2):383. doi: 10.3390/plants12020383 (PMC9863350; doi:10.3390/plants12020383)
Supplement: Supplementary file 1 [file plants-12-00383-s001.zip › plants-2061854-supplemental files/Online Resource S7 Loadings and site vaf_submit.xlsx]

## Sheet: Loadings
Rapid and stable global genetic gain in crop breeding - MDPI Plants
Wallace A Cowling*, Felipe Castro-Urrea, Katia T Stefanova, Li Li, Robert G Banks, Renu Saradadevi, Olaf Sass, Brian P Kinghorn & Kadambot H M Siddique
*Corresponding author, The University of Western Australia, wallace.cowling@uwa.edu.au
Traita	Trial code (Table 1)	Loadings			%VAF
		FA(1)	FA(2)		FA(1)	FA(2)	Total
GY	2016AU2	0.226379	0.232778		20.3412	21.5076	41.8489
	2016AU1	0.200982	0.153076		45.7897	26.5625	72.3522
	2018AU2	0.0350307	6.25213e-05		80.6395	0.000256866	80.6398
	2018AU1	0.204521	0.0878242		81.5545	15.0383	96.5928
	2018CA1	0.431386	-0.0941313		79.2824	3.77496	83.0573
	2020CA1	0.272183	-0.191598		66.8665	33.1335	100
	2020AU1	0.274901	-0.028776		84.5939	0.926927	85.5208
	2020AU2	0.164322	-0.00461781		29.0487	0.0229408	29.0716
				Mean	61.0145	12.6209	73.6354
DTF	2018CA1	0.804462			100
	2018AU1	5.87817			91.9
	2020CA1	0.903283			86.1334
	2020AU1	7.94223			93.1634
	2016AU1	9.99146			100
				Mean	94.2394
PlHt	2016AU1	10.2424	0.514294		99.7485	0.251493	100
	2018AU1	6.99182	2.63455		87.5671	12.4329	100
	2020CA1	7.28239	-4.13259		75.6412	24.3588	100
	2020AU1	11.1377	0.575272		83.2442	0.22208	83.4663
				Mean	86.5502	9.31633	95.8666
Oil	2016AU2	0.998376	0.0912148		69.4244	0.579501	70.0038
	2016AU1	1.35334	0.32873		86.249	5.08887	91.3379
	2018AU1	1.56581	0.478896		91.446	8.55403	100
	2018CA1	1.83111	-0.524612		88.5453	7.268	95.8133
	2020CA1	1.95001	-0.506583		93.6779	6.32212	100
	2020AU1	1.28966	0.513824		81.9936	13.0154	95.0091
				Mean	85.2227	6.80466	92.0274
ProM	2016AU2	1.24736	-0.412644		90.1357	9.86427	100
	2016AU1	1.2105	0.155587		72.2057	1.19286	73.3986
	2018AU1	1.39529	-0.198927		88.1801	1.79236	89.9725
	2018CA1	0.963804	0.102204		52.3225	0.588367	52.9109
	2020CA1	1.4613	0.635351		84.1016	15.8984	100
	2020AU1	1.22743	-0.344626		81.4995	6.42482	87.9243
				Mean	78.0742	5.96019	84.0344
GSL	2016AU2	2.35262	-0.00164813		95.9916	4.71097e-05	95.9917
	2016AU1	2.48405	0.543016		95.4393	4.56072	100
	2018AU1	2.7231	0.381941		84.9925	1.67204	86.6646
	2018CA1	2.40269	-0.842686		89.0465	10.9535	100
	2020CA1	3.0997	-0.756243		94.3821	5.6179	100
	2020AU1	1.91989	1.03328		65.558	18.9892	84.5472
				Mean	87.5683	6.96557	94.5339
OL	2016AU2	2.09343	-0.58287		85.9891	6.6661	92.6552
	2016AU1	2.52321	-0.166285		97.7165	0.424389	98.1409
	2018AU1	2.22126	0.336009		97.7629	2.23706	100
	2020AU1	2.09983	0.425464		94.0271	3.86021	97.8873
				Mean	93.8739	3.29694	97.1708
BL	2016AU2	0.882937	0.0299856		67.7534	0.0781443	67.8315
	2018AU2	0.575471	0.242431		84.8451	15.0577	99.9027
	2020AU2	0.856182	-0.19387		94.3279	4.83647	99.1644
				Mean	82.3088	6.65742	88.9662
SW100	2016AU2	0.0257479			100
	2016AU1	0.0275939			59.1736
	2018AU1	-0.0202507			34.164
	2020AU1	-0.0210313			35.8364
				Mean	57.2935
