# Supplementary material for: Optimal Contribution Selection Improves the Rate of Genetic Gain in Grain Yield and Yield Stability in Spring Canola in Australia and Canada
Source: Plants (Basel). 2023 Jan 13;12(2):383. doi: 10.3390/plants12020383 (PMC9863350; doi:10.3390/plants12020383)
Supplement: Supplementary file 1 [file plants-12-00383-s001.zip › plants-2061854-supplemental files/Online Resource S9_correl additive effects across trials_submit.xlsx]

## Sheet: Online Resource S9 summary
Rapid and stable global genetic gain in crop breeding - MDPI Plants
Wallace A Cowling*, Felipe Castro-Urrea, Katia T Stefanova, Li Li, Robert G Banks,
	Renu Saradadevi, Olaf Sass, Brian P Kinghorn & Kadambot H M Siddique
*Corresponding author, The University of Western Australia, wallace.cowling@uwa.edu.au
(a) Genetic correlations of additive effects for GY across trials from optimum MMM-FA model
(b) Genetic correlations of additive effects for BL across trials from optimum MMM-FA model
(c) Genetic correlations of additive effects for DTF across trials from optimum MMM-FA model
(d) Genetic correlations of additive effects for PlHt across trials from optimum MMM-FA model
(e) Genetic correlations of additive effects for Oil across trials from optimum MMM-FA model
(f) Genetic correlations of additive effects for ProM across trials from optimum MMM-FA model
(g) Genetic correlations of additive effects for GSL across trials from optimum MMM-FA model
(h) Genetic correlations of additive effects for OL across trials from optimum MMM-FA model
(i) Genetic correlations of additive effects for SW100 across trials from optimum MMM-FA model

## Sheet: (a) GY gen corr across trials
(a) Genetic correlations of additive effects for GY across trials from optimum MMM-FA model
	2016-AU2	2016-AU1	2018-AU2	2018-AU1	2018-CA1	2020-CA1	2020-AU1	2020-AU2
2016-AU2	1	0.54	0.41	0.59	0.31	0.1	0.37	0.24
2016-AU1	0.54	1	0.61	0.81	0.5	0.26	0.57	0.36
2018-AU2	0.41	0.61	1	0.81	0.8	0.73	0.83	0.48
2018-AU1	0.59	0.81	0.81	1	0.73	0.52	0.79	0.48
2018-CA1	0.31	0.5	0.8	0.73	1	0.84	0.84	0.48
2020-CA1	0.1	0.26	0.73	0.52	0.84	1	0.81	0.45
2020-AU1	0.37	0.57	0.83	0.79	0.84	0.81	1	0.5
2020-AU2	0.24	0.36	0.48	0.48	0.48	0.45	0.5	1

## Sheet: (b) BL gen corr across trials 
(b) Genetic correlations of additive effects for BL across trials from optimum MMM-FA model
	2016-AU2	2018-AU2	2020-AU2
2016-AU2	1	0.77	0.79
2018-AU2	0.77	1	0.81
2020-AU2	0.79	0.81	1

## Sheet: (c) DTF gen corr across trials
(c) Genetic correlations of additive effects for DTF across trials from optimum MMM-FA model
	2018-CA1	2018-AU1	2020-CA1	2020-AU1	2016-AU1
2018-CA1	1	0.96	0.93	0.97	1
2018-AU1	0.96	1	0.89	0.93	0.96
2020-CA1	0.93	0.89	1	0.9	0.93
2020-AU1	0.97	0.93	0.9	1	0.97
2016-AU1	1	0.96	0.93	0.97	1

## Sheet: (d) PlHt gen corr across trials
(d) Genetic correlations of additive effects for PlHt across trials from optimum MMM-FA model
	2016-AU1	2018-AU1	2020-CA1	2020-AU1
2016-AU1	1	0.95	0.84	0.91
2018-AU1	0.95	1	0.64	0.87
2020-CA1	0.84	0.64	1	0.77
2020-AU1	0.91	0.87	0.77	1

## Sheet: (e) Oil gen corr across trials
(e) Genetic correlations of additive effects for Oil across trials from optimum MMM-FA model
	2016-AU2	2016-AU1	2018-AU1	2018-CA1	2020-CA1	2020-AU1
2016-AU2	1	0.79	0.82	0.76	0.79	0.78
2016-AU1	0.79	1	0.95	0.81	0.84	0.92
2018-AU1	0.82	0.95	1	0.82	0.85	0.97
2018-CA1	0.76	0.81	0.82	1	0.98	0.75
2020-CA1	0.79	0.84	0.85	0.98	1	0.79
2020-AU1	0.78	0.92	0.97	0.75	0.79	1

## Sheet: (f) ProM gen corr across trials
(f) Genetic correlations of additive effects for ProM across trials from optimum MMM-FA model
	2016-AU2	2016-AU1	2018-AU1	2018-CA1	2020-CA1	2020-AU1
2016-AU2	1	0.77	0.93	0.66	0.75	0.94
2016-AU1	0.77	1	0.78	0.62	0.82	0.74
2018-AU1	0.93	0.78	1	0.67	0.81	0.88
2018-CA1	0.66	0.62	0.67	1	0.69	0.63
2020-CA1	0.75	0.82	0.81	0.69	1	0.73
2020-AU1	0.94	0.74	0.88	0.63	0.73	1

## Sheet: (g) GSL gen corr across trials
(g) Genetic correlations of additive effects for GSL across trials from optimum MMM-FA model
	2016-AU2	2016-AU1	2018-AU1	2018-CA1	2020-CA1	2020-AU1
2016-AU2	1	0.96	0.9	0.92	0.95	0.79
2016-AU1	0.96	1	0.93	0.85	0.9	0.88
2018-AU1	0.9	0.93	1	0.83	0.86	0.8
2018-CA1	0.92	0.85	0.83	1	1	0.62
2020-CA1	0.95	0.9	0.86	1	1	0.68
2020-AU1	0.79	0.88	0.8	0.62	0.68	1

## Sheet: (h) OL gen corr across trials
(h) Genetic correlations of additive effects for OL across trials from optimum MMM-FA model
	2016-AU2	2016-AU1	2018-AU1	2020-AU1
2016-AU2	1	0.93	0.88	0.85
2016-AU1	0.93	1	0.97	0.95
2018-AU1	0.88	0.97	1	0.99
2020-AU1	0.85	0.95	0.99	1

## Sheet: (i) SW100 gen corr across trial
(i) Genetic correlations of additive effects for SW100 across trials from optimum MMM-FA model
	2016-AU2	2016-AU1	2018-AU1	2020-AU1
2016-AU2	1	0.77	-0.58	-0.6
2016-AU1	0.77	1	-0.45	-0.46
2018-AU1	-0.58	-0.45	1	0.35
2020-AU1	-0.6	-0.46	0.35	1
